# Supplementary material for: Comprehensive genomic characterisation of the NAC transcription factor family and its response to drought stress in Eucommia ulmoides
Source: PeerJ journal article supplement (doi:10.7717/peerj.16298), 2023-10-23
Supplement: Supplementary_figure.pdf [file Supplementary_figure.pdf]

## Supplementary Figures

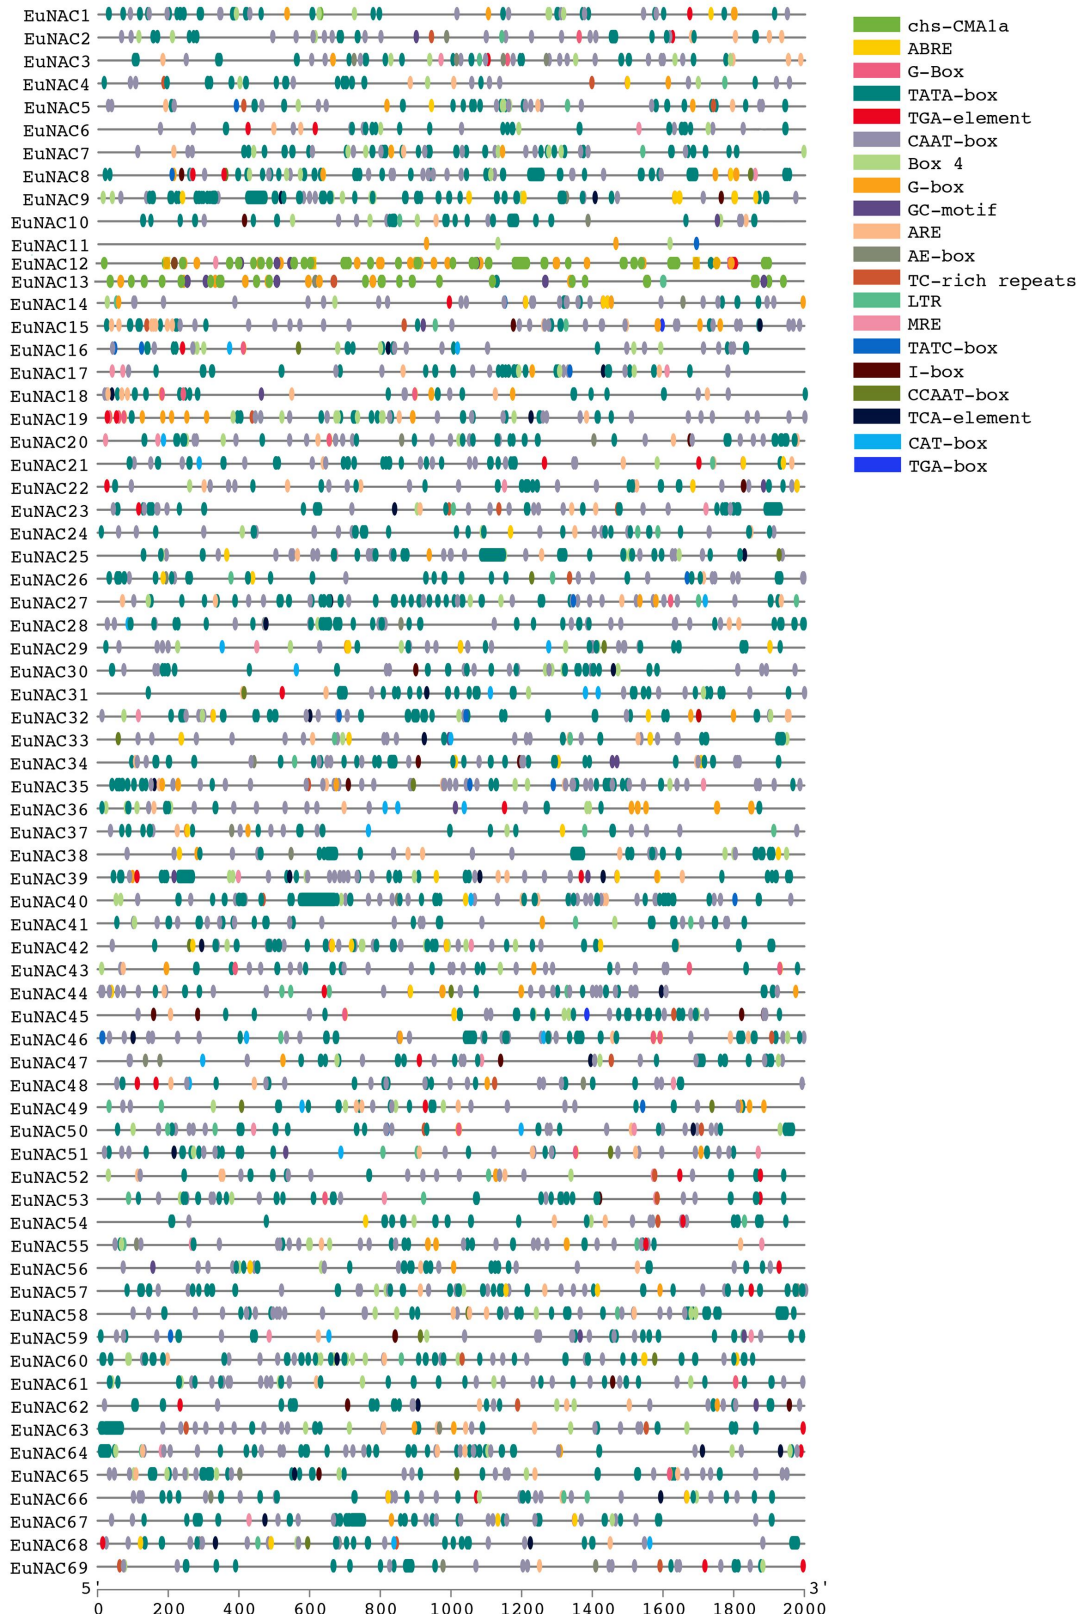

Figure S1. cis-acting elements in each EuNAC
